# Supplementary material for: Clinical significance of P-class pumps in cancer
Source: PubMed Central journal article supplement — Oncol Lett. 2021 Jul 12;22(3):658. doi: 10.3892/ol.2021.12919 (PMC8298992; doi:10.3892/ol.2021.12919), 2021-07-12
Supplement: Supplementary_Data.pdf [file Supplementary_Data.pdf]

Table SI. Clinical trials using modulators of P-class pumps (retrieved from clinicaltrials.gov).

| A, Completed                |                                                                                                                                                                                 |                                              |                     |
|-----------------------------|---------------------------------------------------------------------------------------------------------------------------------------------------------------------------------|----------------------------------------------|---------------------|
| Study identifier and status | Study title                                                                                                                                                                     | Type of malignancy                           | Compound studied    |
| Na/K ATPases                |                                                                                                                                                                                 |                                              |                     |
| NCT00002862                 | Perillyl Alcohol in Treating Patients With Refractory Cancer                                                                                                                    | Lymphoma, unspecified adult solid tumor      | Perillyl alcohol    |
| NCT00003219                 | Perillyl Alcohol in Treating Patients With Metastatic Breast Cancer                                                                                                             | Breast cancer                                | Perillyl alcohol    |
| NCT00003238                 | Perillyl Alcohol in Treating Patients With Metastatic Prostate Cancer That Has Not Responded to Hormone Therapy                                                                 | Prostate cancer                              | Perillyl alcohol    |
| NCT00003769                 | Perillyl Alcohol Followed by Surgery in Treating Patients With Stage II or Stage III Pancreatic Cancer                                                                          | Pancreatic cancer                            | Perillyl alcohol    |
| NCT00650910                 | Study To Examine The Effects Of Lapatinib On The Pharmacokinetics Of Digoxin In Subjects w/ ErbB2 Positive Breast Cancer                                                        | Breast cancer                                | Digoxin             |
| NCT00837239                 | Huachansu & Gemcitabine in Pancreatic Cancer                                                                                                                                    | Pancreatic cancer                            | Huachansu           |
| NCT01162135                 | Digoxin for Recurrent Prostate Cancer                                                                                                                                           | Prostate cancer                              | Digoxin             |
| NCT01517399                 | Drug-drug Interaction Study of Tivantinib (ARQ 197) With Omeprazole, S-warfarin, Caffeine, Midazolam, and Digoxin in Cancer Subjects                                            | Advanced solid tumors                        | Digoxin, Omeprazole |
| NCT01763931                 | DIG-HIF1 Pharmacodynamic Trial in Newly Diagnosed Operable Breast Cancer                                                                                                        | Breast cancer                                | Digoxin             |
| NCT01765569                 | A Pharmacokinetics Study to Investigate the Effect of Vemurafenib on Digoxin in Patients With BRAFV600 Mutation-Positive Metastatic Melanoma                                    | Melanoma                                     | Digoxin             |
| NCT01887288                 | Capecitabine With Digoxin for Metastatic Breast Cancer                                                                                                                          | Breast cancer                                | Digoxin             |
| NCT02106845                 | Effect of Regorafenib on Digoxin and Rosuvastatin in Patients With Advanced Solid Malignant Tumors.                                                                             | Locally advanced or metastatic solid tumors  | Digoxin             |
| NCT02138292                 | A Phase 1B Clinical Trial of Trametinib Plus Digoxin in Patients With Unresectable or Metastatic BRAF Wild-type Melanoma                                                        | Melanoma                                     | Digoxin             |
| NCT02626234                 | A Drug-drug Interaction (DDI) Study to Assess the Effect of INC280 on the Pharmacokinetics of Digoxin and Rosuvastatin in Patients With cMET-dysregulated Advanced Solid Tumors | Advanced solid tumors                        | Digoxin             |
| NCT02740712                 | Pharmacokinetic Drug-Drug Interaction Study of Rucaparib                                                                                                                        | Digoxin, Omeprazole<br>Advanced solid tumors |                     |
| SERCA                       |                                                                                                                                                                                 |                                              |                     |
| NCT00256334                 | Resveratrol for Patients With Colon Cancer                                                                                                                                      | Colon cancer                                 | Resveratrol         |
| NCT00433576                 | Resveratrol in Treating Patients With Colorectal Cancer That Can Be Removed By Surgery                                                                                          | Colorectal cancer                            | Resveratrol         |
| NCT00920803                 | A Clinical Study to Assess the Safety, Pharmacokinetics, and Pharmacodynamics of SRT501 in Subjects With Colorectal Cancer and Hepatic Metastases                               | Colorectal neoplasms                         | Resveratrol         |
| NCT01476592                 | A Biological Study of Resveratrol's Effects on Notch-1 Signaling in Subjects With Low Grade Gastrointestinal Tumors                                                             | Neuroendocrine tumor                         | Resveratrol         |
| NCT01056029                 | Dose-Escalation Phase 1 Study of G-202 (Mipsagargin) in Patients With Advanced Solid Tumors                                                                                     | Advanced solid tumors                        | Mipsagargin         |
| NCT01777594                 | Study of G-202 (Mipsagargin) as Second-Line Therapy Following Sorafenib in Hepatocellular Carcinoma (G-202-003)                                                                 | Hepatocellular carcinoma                     | Mipsagargin         |
| NCT02067156                 | Efficacy, Safety and CNS Exposure of G-202 (Mipsagargin) in Patients With Recurrent or Progressive Glioblastoma                                                                 | Glioblastoma multiforme                      | Mipsagargin         |

Table SI. Continued.

| Study identifier and status | Study title                                                                                                                                                      | Type of malignancy                   | Compound studied         |
|-----------------------------|------------------------------------------------------------------------------------------------------------------------------------------------------------------|--------------------------------------|--------------------------|
| H/K ATPases                 |                                                                                                                                                                  |                                      |                          |
| NCT00001191                 | The Use of Oral Omeprazole and Intravenous Pantoprazole in Patients With Hypersecretion of Gastric Acid                                                          | Gastrinoma                           | Pantoprazole, Omeprazole |
| NCT00002682                 | Antibiotic Therapy and Antacids in Patients With Malt Lymphoma of the Stomach                                                                                    | Gastric MALT lymphoma                | Omeprazole               |
| NCT00003151                 | Antibiotic Therapy in Treating Patients With Low Grade Gastric Lymphoma                                                                                          | Gastric lymphoma                     | Omeprazole               |
| NCT00079833                 | Esomeprazole In Patients With Gastric Acid Hypersecretory States Including Idiopathic Hypersecretion and Zollinger-Ellison Syndrome                              | Zollinger-Ellison syndrome           | Esomeprazole             |
| NCT00201422                 | Eradication of Helicobacter Pylori in the Management of Stage IE & IIE-1 Primary Low-grade B Cell Lymphoma of MALToma                                            | MALT lymphoma                        | Omeprazole               |
| NCT00298779                 | Open-Label Study to Assess the Effect of Omeprazole. on the Pharmacokinetics of VELCADE in Patients With Either Advanced Solid Tumors or Non-Hodgkin's Lymphoma  | Non-Hodgkin's lymphoma               | Omeprazole               |
| NCT00327132                 | Prospective Study of First-line Antibiotic Therapy for Early-stage Gastric MALT Lymphoma for Treatment Outcome                                                   | Early-stage gastric MALT lymphoma    | Omeprazole               |
| NCT00339768                 | A Randomized Multi-Intervention Trial to Inhibit Precancerous Gastric Lesions in Lingu, Shandong Province                                                        | Precancerous gastric lesions         | Omeprazole               |
| NCT00420615                 | Evaluate the Effects of Patupilone on the Pharmacokinetics of Midazolam and Omeprazole in Patients With Advanced Malignancies                                    | Advanced solid tumor                 | Omeprazole               |
| NCT00473980                 | Preoperative Non-steroidal Anti-inflammatory Drugs(NSAID) to Colorectal Cancer Patients                                                                          | Colorectal cancer                    | Esomeprazole             |
| NCT00474903                 | Esomeprazole Magnesium With or Without Aspirin in Preventing Esophageal Cancer in Patients With Barrett Esophagus                                                | Esophageal cancer                    | Esomeprazole             |
| NCT00559182                 | A Study of MK-8033 in Patients With Advanced Solid Tumors (MK-8033-001)                                                                                          | Omeprazole<br>Advanced solid tumor   |                          |
| NCT00844675                 | Effects of Oral Rabeprazole on the Prevention of Ulcer Bleeding Following Endoscopic Mucosal Resection                                                           | Early gastric adenocarcinoma         | Rabeprazole              |
| NCT00849329                 | A Study to Examine the Effects of Esomeprazole on the Pharmacokinetics of Orally Administered Lapatinib in Subjects With Metastatic ErbB2 Positive Breast Cancer | Breast cancer                        | Esomeprazole             |
| NCT01042704                 | Bendamustine in Combination With Lenalidomide and Dexamethasone in Refractory or Relapsed Multiple Myeloma                                                       | Multiple myeloma                     | Omeprazole               |
| NCT01069081                 | Docetaxel and Cisplatin Chemotherapy With or Without High Dose Proton Pump Inhibitor in Metastatic Breast Cancer                                                 | Breast cancer                        | Esomeprazole             |
| NCT01163903                 | Pantoprazole With Doxorubicin for Advanced Cancer Patients With Extension Cohort of Patients With Solid Tumours                                                  | Advanced solid tumors                | Pantoprazole             |
| NCT01205230                 | VEG113971: An Open-Label Study of the Effects of Ketoconazole or Esomeprazole on Pazopanib PK                                                                    | Advanced solid tumor malignancy      | Esomeprazole             |
| NCT01216267                 | Evaluation of Methods for the Determination of Chromogranin A in Routine Blood Samples                                                                           | Neuroendocrine carcinoma (carcinoid) | Lansoprazole             |
| NCT01218620                 | Gamma-Secretase/Notch Signalling Pathway Inhibitor RO4929097 in Treating Patients With Advanced Solid Tumors                                                     | Advanced solid tumor                 | Omeprazole               |

Table SI. Continued.

| Study identifier and status | Study title                                                                                                                                         | Type of malignancy                                                           | Compound studied                    |
|-----------------------------|-----------------------------------------------------------------------------------------------------------------------------------------------------|------------------------------------------------------------------------------|-------------------------------------|
| NCT01264822                 | Prognostic Study of Gastric MALT Lymphoma After Eradication of <i>Helicobacter Pylori</i>                                                           | Gastric low-grade MALT lymphoma with <i>Helicobacter pylori</i> infection    | Rabeprazole                         |
| NCT01287598<br>NCT01322633  | BAY73-4506 Probe Substrate Study<br>Risk of Cancer Among Pantoprazole Users                                                                         | Advanced Solid Tumour<br>Gastric cancer, gastrointestinal cancer, any cancer | Omeprazole<br>Pantoprazole          |
| NCT01434485                 | Nexium Capsules Clinical Experience Investigation                                                                                                   | Zollinger-Ellison syndrome                                                   | Esomeprazole                        |
| NCT01435525                 | Nexium Capsules <i>Helicobacter Pylori</i> Specific Clinical Experience Investigation                                                               | Gastric MALT lymphoma, early gastric cancer                                  | Esomeprazole                        |
| NCT01539655                 | Study in Healthy Volunteers to Assess Effect of Omeprazole and Ranitidine on the Pharmacokinetics of Vandetanib (Vandetanib)                        | Medullary thyroid cancer                                                     | Omeprazole                          |
| NCT01585623                 | Drug Interaction Study of SAR302503 in Patients With Solid Tumor                                                                                    | Advanced solid tumor                                                         | Omeprazole                          |
| NCT01596647                 | Pharmacokinetic Drug-drug Interaction Study of Dovitinib (TKI258) in Patients With Advanced Solid Tumors                                            | Advanced solid tumors, excluding breast cancer                               | Omeprazole                          |
| NCT01844583                 | Safety, Tolerability and PK of Concomitant Esomeprazole and Rifampin, and QT Study on Single and Multiple-doses of Alisertib                        | Metastatic tumors, advanced solid tumors, lymphomas                          | Esomeprazole                        |
| NCT01911728                 | Drug-drug Interaction Study With MDV3100 and a Cocktail of Substrates                                                                               | Prostate cancer                                                              | Omeprazole                          |
| NCT01954043                 | A Pharmacokinetics (PK) Study of the Effects Rabeprazole and Rifampin on Dabrafenib in Subjects With BRAF V600 Mutation Positive Tumors             | BRAF V600 mutation-positive tumor                                            | Rabeprazole                         |
| NCT02254889                 | Pain After Endoscopic Submucosal Dissection                                                                                                         | Gastric neoplasm                                                             | Proton pump inhibitor<br>Omeprazole |
| NCT02518373                 | Effect of G17DT in Patients With Stage II/III Colorectal Cancer (CC5)                                                                               | Colorectal Cancer                                                            | Omeprazole                          |
| NCT02666976                 | The Prospective Study on the Effect of Ilaprazole in Non-erosive Reflux Disease Patients; Focused on Histologic Findings and Inflammatory Biomarker | Upper gastrointestinal subepithelial tumors                                  | Ilaprazole                          |
| NCT02682446                 | The Efficacy of Serum Pepsinogen for Prediction of Metachronous Gastric Neoplasm                                                                    | Gastric cancer                                                               | Lansoprazole                        |
| NCT02730533                 | The Efficacy of Esomeprazole Premedication on Intraoperative Bleeding During Gastric ESD                                                            | Gastric neoplasms                                                            | Esomeprazole                        |
| NCT02800330                 | The Effects of the Proton Pump Inhibitor Esomeprazole on the Bioavailability of Regorafenib (REGORA)                                                | Colorectal neoplasms, gastrointestinal stromal tumors                        | Esomeprazole                        |
| NCT03219723                 | Drug Use Surveillance of Takecab for 'Supplement to <i>Helicobacter Pylori</i> Eradication'                                                         | Gastric MALT lymphoma                                                        | Vonoprazan                          |

## B, Recruiting

| Study identifier and status | Study title                                                                                      | Type of malignancy | Compound studied |
|-----------------------------|--------------------------------------------------------------------------------------------------|--------------------|------------------|
| Na/K ATPases<br>NCT02212639 | Phase II Multicentric Study of Digoxin Per os in Classic or Endemic Kaposi' s Sarcoma (KADIG 01) | Kaposi's sarcoma   | Digoxin          |

Table SI. Continued.

| Study identifier and status | Study title                                                                                                                                                                                                                                                                                                | Type of malignancy                                                                                                              | Compound studied       |
|-----------------------------|------------------------------------------------------------------------------------------------------------------------------------------------------------------------------------------------------------------------------------------------------------------------------------------------------------|---------------------------------------------------------------------------------------------------------------------------------|------------------------|
| NCT02530398                 | A Tolerance Trial of Cinobufacini Injection Intraperitoneal Perfusion on Digestive System Cancer With Ascites                                                                                                                                                                                              | Digestive system cancer with malignant ascites                                                                                  | Cinobufacini           |
| NCT02647125                 | A Study of Comparing Huachansu Plus Thoracic RT Versus RT Alone For ESCC                                                                                                                                                                                                                                   | Esophageal squamous cell carcinoma                                                                                              | Huachansu              |
| NCT02871869                 | Cinobufacini Tablets Combined With Chemotherapeutic Protocol in Treatment of Diffuse Large B Cell Lymphoma                                                                                                                                                                                                 | Diffuse large B cell lymphoma                                                                                                   | Cinobufacini           |
| NCT02906800                 | Potential of Cisplatin-based Chemotherapy by Digoxin in Advanced Unresectable Head and Neck Cancer Patients (DIGHANC)                                                                                                                                                                                      | Head and neck cancer                                                                                                            | Digoxin                |
| NCT03843229                 | Clinical Trial of Cinobufacini Combined With Transarterial Chemoembolization (TACE) on Primary Liver Cancer                                                                                                                                                                                                | Liver cancer                                                                                                                    | Cinobufacini           |
| SERCA                       |                                                                                                                                                                                                                                                                                                            |                                                                                                                                 |                        |
| NCT00920556                 | A Clinical Study to Assess the Safety and Activity of SRT501 Alone or in Combination With Bortezomib in Patients With Multiple Myeloma                                                                                                                                                                     | Multiple myeloma (Resveratrol)                                                                                                  | SRT501                 |
| H/K ATPases                 |                                                                                                                                                                                                                                                                                                            |                                                                                                                                 |                        |
| NCT02387203                 | Antibiotic Treatment and Long-term Outcomes of Patients With Pseudomyxoma Peritonei of Appendiceal Origin                                                                                                                                                                                                  | Pseudomyxoma peritonei, appendiceal neoplasms                                                                                   | Lansoprazole           |
| NCT02388581                 | First-line Antibiotic Therapy for Early-stage HP(+) Gastric Pure DLBCL                                                                                                                                                                                                                                     | Gastric diffuse large b-cell lymphoma                                                                                           | Lansoprazole           |
| NCT02595372                 | Inhibiting Fatty Acid Synthase to Improve Efficacy of Neoadjuvant Chemotherapy                                                                                                                                                                                                                             | Breast cancer                                                                                                                   | Omeprazole             |
| NCT03028103                 | Open-Label, Multicenter, Two-Part, Phase 1 Study to Characterize Effects of a Moderate CYP3A Inhibitor on PK of Tazemetostat, Effects of Tazemetostat on PK of CYP2C8 and CYP2C19 Substrates, and Effect of Increased Gastric pH on PK of Tazemetostat in B-cell Lymphoma or Advanced Solid Tumor Patients | Diffuse large B cell lymphoma, primary mediastinal lymphoma, mantle cell lymphoma, advanced solid tumor, marginal zone lymphoma | Omeprazole             |
| NCT03192059                 | Study of Pembrolizumab, Radiation and Immune Modulatory Cocktail in Cervical/Uterine Cancer (PRIMMO)                                                                                                                                                                                                       | Cervical cancer, endometrial carcinoma or uterine sarcoma                                                                       | Lansoprazole           |
| NCT03267680                 | IRX-2 Regimen in Treating Women With Cervical Squamous Intraepithelial Neoplasia 3 or Squamous Vulvar Intraepithelial Neoplasia 3                                                                                                                                                                          | Cervical squamous cell carcinoma in situ, vulvar high grade squamous intraepithelial lesion                                     | Omeprazole             |
| NCT03537833                 | Association Between Proton Pump Inhibitors and Hematologic Toxicity of Pemetrexed (IPPEM)                                                                                                                                                                                                                  | Non-small cell lung cancer or mesothelioma                                                                                      | Proton pump inhibitors |
| NCT03647072                 | PPI Versus Histamine Antagonists as Adjuvant to Chemotherapy                                                                                                                                                                                                                                               | Non-Hodgkin's Lymphoma                                                                                                          | Lansoprazole           |
| NCT03864042                 | Pharmacokinetic Drug-drug Interaction Study of Encorafenib and Binimetinib on Probe Drugs in Patients With BRAF V600-mutant Melanoma or Other Advanced Solid Tumors                                                                                                                                        | Advanced solid tumors, metastatic melanoma                                                                                      | Omeprazole             |

## C, Not yet recruiting

| Study identifier and status | Study title                                                                                | Type of malignancy       | Compound studied |
|-----------------------------|--------------------------------------------------------------------------------------------|--------------------------|------------------|
| Na/K ATPases                |                                                                                            |                          |                  |
| NCT03236636                 | The Phase III Study of Icaritin Versus HUACHANSU PIAN in Hepatocellular Carcinoma Subjects | Hepatocellular carcinoma | Huachansu        |

Table SI. Continued.

| Study identifier and status | Study title                                                                                                                                                                            | Type of malignancy                                | Compound studied    |
|-----------------------------|----------------------------------------------------------------------------------------------------------------------------------------------------------------------------------------|---------------------------------------------------|---------------------|
| NCT03720366                 | A Study of Perpetrator Drug Interactions of Enasidenib in AML Patients                                                                                                                 | Acute myeloid leukemia                            | Digoxin, Omeprazole |
| D, Withdrawn                |                                                                                                                                                                                        |                                                   |                     |
| Study identifier and status | Study title                                                                                                                                                                            | Type of malignancy                                | Compound studied    |
| Na/K ATPases<br>NCT01562301 | Sublingual Anvirzel in Advance Non-Small Cell Lung Cancer (NSCLC)                                                                                                                      | Lung cancer                                       | Anvirzel            |
| NCT02915666<br>SERCA        | A Clinical Trial of Patients With Melanoma                                                                                                                                             | Melanoma                                          | Digoxin             |
| NCT02261844                 | Resveratrol and Human Hepatocyte Function in Cancer                                                                                                                                    | Liver cancer                                      | Resveratrol         |
| E, Status unknown           |                                                                                                                                                                                        |                                                   |                     |
| Study identifier and status | Study title                                                                                                                                                                            | Type of malignancy                                | Compound studied    |
| Na/K ATPases<br>NCT00022425 | Perillyl Alcohol in Preventing Recurrent Breast Cancer in Women Who Have Been Treated With Surgery With or Without Adjuvant Therapy                                                    | Breast cancer                                     | Perillyl Alcohol    |
| NCT01715532                 | Role of Huachansu in Treating Hepatocellular Carcinoma and the Correlation With Na <sup>+</sup> /K <sup>+</sup> -ATPase                                                                | Hepatocellular carcinoma                          | Huachansu           |
| NCT02860429                 | Clinical Trial of Cinobufacini Injection Combined With Oxaliplatin Regimen on Gastrointestinal Carcinoma                                                                               | Gastrointestinal cancer                           | Cinobufacini        |
| NCT01236690                 | Study of Hepatoma Treated by Perfusing Cinobufacin Through Hepatic Artery Combining Embolotherapy                                                                                      | Hepatoma                                          | Cinobufacin         |
| F, Terminated               |                                                                                                                                                                                        |                                                   |                     |
| Study identifier and status | Study title                                                                                                                                                                            | Type of malignancy                                | Compound studied    |
| H/K ATPases<br>NCT00332748  | A Phase I Study of BMS-275183 (Oral Taxane) Given on a Daily Schedule in Combination With Esomeprazole (Nexium) in Patients With Advanced Cancer                                       | Advanced malignancies                             | Esomeprazole        |
| NCT01290380                 | A Study to Evaluate the Effects of ASA404 Alone or in Combination With Taxane-based Chemotherapies on the Pharmacokinetics of Drugs in Patients With Advanced Solid Tumor Malignancies | Solid tumor malignancies                          | Omeprazole          |
| Na/K ATPases<br>NCT00281021 | Second Line Erlotinib (Tarceva) Plus Digoxin in Non-Small Cell Lung Cancer                                                                                                             | Non-small cell lung cancer                        | Digoxin             |
| NCT03113071                 | Safety and Activity of Digoxin With Decitabine in Adult AML and MDS                                                                                                                    | Acute myeloid leukemia, myelodysplastic syndromes | Digoxin             |

SERCA, sarcoendoplasmic reticulum calcium ATPase; MALT, mucosa-associated lymphoid tissue.
